# Supplementary material
Source: PubMed Central journal article supplement (PMC3192921)
Supplement: NIHMS318339-supplement-2.pdf [file NIHMS318339-supplement-2.pdf]

## **Online Methods**

### *Expression and Purification of DnaA*

Residues 76-399 of *A. aeolicus* DnaA (containing the AAA+ and Duplex-DNA binding regions) were expressed as a TEV-protease cleavable His<sub>6</sub>-MBP fusion and purified as previously described<sup>25</sup>. As a final purification step, untagged DnaA proteins (from TEV cleavage) were run over an S-200 size-exclusion column (GE) in gel-filtration buffer (50 mM HEPES pH 7.5, 500 mM KCl, 10% (v/v) glycerol, 5 mM MgCl<sub>2</sub>, 100 μM ADP). Monomeric species were pooled, concentrated and flash-frozen for storage at -80°C. For mutagenesis studies, changes were introduced into the His<sub>6</sub>-MBP-DnaA construct using QuickChange (Stratagene).

### *Crystallization and DNA Soaking*

Following gel filtration of DnaA in crystallization buffer (20 mM HEPES pH 7.5, 250 mM KCl, 250 mM KBr, 10% (v/v) glycerol, 10 mM MgCl<sub>2</sub>, 100 μM AMPPCP), monomeric species were pooled, concentrated to 10 mg/ml at 4°C, and flash-frozen for storage at -80°C. Crystallization by hanging-drop vapor diffusion was performed by mixing 1.3 μL of freshly-thawed DnaA in crystallization buffer and 1 μL of well solution (15-35 mM Sodium Cacodylate pH 6.5, 26% 1,2-propandiol and 1-2% PEG 2000 MME) at 18°C. Large rod-like crystals appeared within one to two weeks and reached maximal size around three weeks. Crystals were transferred by looping to a low-salt soaking solution (20 mM HEPES pH 7.5, 30 mM Sodium Cacodylate pH 6.5, 10% (v/v) glycerol, 10 mM MgCl<sub>2</sub>, 26% 1,2-propandiol, 2.5% PEG 2000 MME and 200 μM AMPPCP) containing 5 mM ssDNA. After 6 h, crystals were looped and transferred to a second drop of soaking solution containing 5 mM ssDNA, and left overnight to ensure both complete removal of remaining salt and allow time for binding. The crystals were then looped and flash frozen in liquid nitrogen in preparation for data collection.

Previous biochemical studies revealed no apparent sequence preference for ssDNA by *A. aeolicus* DnaA<sup>25</sup>, so DNAs of various sequences and lengths were all individually tested (dT<sub>n</sub> (n = 3 to 12) and dA<sub>n</sub> (n = 3 to 12), Elim Biopharmaceuticals). Data collection and structure determination revealed that dA<sub>12</sub> generated the strongest electron density, although similar, albeit weaker and less connected density, was observed for dT oligos and smaller dA substrates.

#### *Data Collection and Structure Determination*

Data were collected at Beamline 8.3.1 at the Advanced Light Source (ALS)<sup>44</sup> and processed using HKL-2000<sup>45</sup>. Crystals belong to the space group P2<sub>1</sub>2<sub>1</sub>2<sub>1</sub>, with dA<sub>12</sub> soaked crystals having unit cell dimensions  $a = 99.8 \text{ \AA}$ ,  $b = 114.2 \text{ \AA}$  and  $c = 201.3 \text{ \AA}$  (**Table S1**). Data were phased using molecular replacement (MR) as implemented in PHENIX<sup>46</sup>, using a DNA-free DnaA tetramer as a search model (PDB ID 2HCB)<sup>14</sup>. Initial F<sub>o</sub>-F<sub>c</sub> electron density maps containing clear density for DNA were generated using rigid body and grouped B-factor refinement with PHENIX<sup>46</sup>. Further refinement was conducted using multidomain, NCS-restrained, simulated annealing in PHENIX<sup>46</sup>, 4-fold multidomain NCS averaging with a custom solvent mask (including the region of DNA binding), density modification using resolve<sup>47</sup>, and manual model building in COOT<sup>48</sup>. During the final stages of refinement, 4-fold multidomain NCS and secondary structure restraints were retained for AMPPCP and the entire protein except residues 255 to 265, which differed between chains as a result of crystal packing interactions. Composite, simulated-annealing omit maps generated with CNS<sup>49</sup>, were used as a guide for building with COOT. DNA and waters were manually added to the model, and final rounds of refinement with PHENIX were conducted with grouped B-factor modeling, as well as NCS restraints and TLS modeling of individual protein domains (comprising three TLS groups total: the AAA+core (aa 76-241) plus AMPPCP; the AAA+  $\alpha$ -helical "lid" (aa 242-254 and 266-241); and the duplex-DNA binding domain (aa 291-399)). All panels of figures with renderings of structures and electron density were prepared with PyMol<sup>50</sup>.

The final model contains one DnaA tetramer bound to one dA<sub>12</sub> per asymmetric unit. A clear 5' or 3' break between successive dA<sub>12</sub> substrates was not present in the electron density, indicating that during the soaking procedure, different DNA molecules bound in multiple registers to consecutive DnaA protomers throughout the crystal. Accordingly, a terminal 5' phosphate, which was not present in the substrate used for soaking, was added to the modeled dA<sub>12</sub> DNA.

### *Polarity of DNA Binding*

During refinement, DNA was initially modeled independently into the DnaA pore with one of two possible polarities. Compared to the 5→3' polarity presented in the paper, refinement of the model with the dA<sub>12</sub> substrate running 3'→5' (from the arginine finger side to the nucleotide-binding face of a DnaA protomer) resulted in only marginally higher  $R_{\text{work}}$  and  $R_{\text{free}}$  values (~0.1%), but also the appearance of off-model positive difference density and on-model negative difference density in  $F_o-F_c$  maps (the model as presented in the paper did not display such features). Simultaneous refinement with two DNAs, each at half occupancy, with opposing polarities of the dA<sub>12</sub> substrate resulted in ~0.3% higher  $R_{\text{work}}$  and  $R_{\text{free}}$  values, and again showed unfavorable difference density in  $F_o-F_c$  maps.

Recognizing that these differences, while consistent with our build, were subtle and did not definitively resolve the ssDNA binding polarity to DnaA, we set out to further test our assignment. To this end, we designed and had synthesized (by Trilink BioTechnologies) two specialized, di-adenosyl nucleotide substrates that would give rise to a clear distinction in binding orientation: 5'-p(Br-A)pAp and 5'-p( $\epsilon$ -A)pAp, where "Br-A" indicates a bromo-deoxyadenosine label, " $\epsilon$ -A" indicates an etheno-deoxyadenosine label, and "p" indicates a phosphate moiety. Soaking of crystals with these dinucleotide substrates was performed as described for ssDNA substrates (we note that in our soaking trials with oligos as short as dA<sub>3</sub>, we observed density associated with DnaA protomers consistent with that seen

for the trinucleotide repeats when using dA<sub>12</sub>). Unfortunately, data collected with the ε-A substituted oligo yielded maps with density for dinucleotides bound to each monomer but additional density for the EthenoA was not clearly visible, likely due to the low ~3.4 Å resolution limit of the DnaA crystals. At the same time, SAD datasets collected with the Br-A substituted oligo did not yield useful maps, due either to the weak diffraction of the crystals (and accompanying radiation damage as we attempted to maximize data signal-to-noise at the bromine absorption maximum<sup>51</sup>), to incomplete bromine labeling, or both. We note that we carried out soaks with longer Br-dA labeled (and Br-dU labeled) oligos, but these efforts were not successful again because of weak diffraction. Additional experiments to test the orientation (e.g., using labeled oligo/protein pairs and FRET) were considered, but ruled out due to the small binding site size for substrate DNA, and an inability to find a suitable pair of labeling sites that could report on differing binding orientations.

As a consequence, although our data are supportive of the polarity presented in our model, we cannot definitively rule out the possibility that ssDNA might also be binding to DnaA in the crystal in an opposing direction. Nonetheless, several findings support the idea that DnaA binds single-stranded DNA in a defined orientation that is consistent with the direction suggested here. For example, following nucleoprotein complex formation on *oriC*, DnaA melts AT-rich regions in the DUE<sup>12</sup>; two independent reports have found that *E. coli* DnaA binds specifically to only one strand (the so-called “top” strand) of the DUE during this process<sup>15, 16</sup>. The importance of DnaA binding polarity becomes clear during the next stage of initiation, when the DnaB helicase is loaded. Modeling studies based on the known DnaB translocation polarity (5'→3') and known pairwise interactions between DnaB, DnaC and DnaA, have suggested that top-strand loading involves a direct interaction between DnaA and DnaC that has been observed biochemically and depends on the AAA+ domains of the two proteins<sup>19</sup>. Since AAA+ domains assemble with a defined orientation, in which the arginine finger face of one protomer points into the nucleotide binding face of a second

subunit, it follows that DnaA molecules likely position themselves on the top strand with only one of their two AAA+ domain surfaces presented to DnaC. While the polarity of the DnaA-DnaC interaction has not been established, a mutation on the arginine finger face of the *E. coli* DnaA AAA+ domain, R281A, is reported to disrupt helicase loading, but not *oriC* melting<sup>52</sup>; this finding suggests that DnaA interacts with DnaC using its arginine-finger face. In our structures, the 5' end of the modeled DNA resides near the arginine finger face of DnaA, a configuration consistent with these data.

### *ssDNA Extension Assay*

Extension of dT<sub>21</sub> oligonucleotides labeled with Cy3 and Cy5 (FR-dT<sub>21</sub>) by DnaA was monitored by Förster Resonance Energy Transfer (FRET) using a FluoroMax-4 (Horiba Jobin Yvon) spectrofluorimeter. Measurements were carried out at 25°C in 20 µL with 25 nM of FR-dT<sub>21</sub> and either 10 µM of DnaA in DnaA extension buffer (50 mM HEPES pH 7.5, 125 mM KCl, 2% (v/v) glycerol, 10 mM MgCl<sub>2</sub> and 2 mM ADP or ADP•BeF<sub>3</sub>) or 10 µM of RecA in RecA extension buffer (25 mM Tris-acetate pH 7.5, 100 mM Na-acetate, 10 mM Mg-acetate, 1 mM DTT and 2 mM ADP or ATP<sub>γ</sub>S). Emission scans from 545 to 700 nm were collected following the excitation of Cy3 at 530 nm, divided by the excitation intensity, and then corrected for the wavelength-dependent sensitivity of the detector. FRET efficiencies and distances were determined by comparing the Cy3 fluorescence from the doubly-labeled substrate (FR-dT<sub>21</sub>) with the Cy3 fluorescence from a substrate only having a Cy3 label (C3-dT<sub>21</sub>) under the same conditions.

### *Influence of Proteins on Dye Behavior*

To ensure that all influences on dye behavior were properly considered when processing the FRET data from the DNA extension assay (**Figure 3**), the fluorescence and absorbance of each dye was monitored independently for each experimental condition. Emission and absorbance scans of substrates labeled only with the Cy3 donor (C3-dT<sub>21</sub>) were collected in buffer alone, and with protein

in the presence of ATP mimics or ADP (**Figure S8cii, S8ciii, S8dii and S8diii**). Emission scans revealed pronounced protein- and nucleotide-dependent enhancement of donor fluorescence, but negligible differences in donor absorbance. Similar, but less significant effects have been observed previously for RecA at a concentration of 1  $\mu\text{M}$  (comparable to our working concentration of 10  $\mu\text{M}$ )<sup>37</sup>. A similar enhancement in acceptor fluorescence (and lack of effect on acceptor absorbance) also was observed in the doubly-labeled substrate, FR-dT<sub>21</sub> (**Figure S8civ, S8cv, S8div and S8dv**). These effects are not surprising, as the spectral properties of fluorescent dyes are known to undergo dramatic variation depending on chemical environment<sup>53, 54</sup>. However, these controls also indicated that we needed to take into account additional corrections to obtain accurate distance measurements. In particular, the changes in donor fluorescence, but not donor absorbance, were indicative of changes in the donor quantum yield ( $\Phi_D$ ), which is used to calculate  $R_0$  ( $\text{\AA}$ ), the distance corresponding to a FRET efficiency of 50%:

$$R_0 = 8.79 * 10^{-5} (J \kappa^2 n^{-4} \Phi_D)^{1/6}$$

where  $J$  = the spectral overlap between the donor emission and acceptor absorption;  $\kappa^2$  = a geometric factor that depends on the orientation of donor and acceptor;  $n$  = the refractive index of the medium between donor and acceptor<sup>54</sup>.

To determine the donor quantum yield under different experimental conditions, we used Rhodamine 6G as a standard for calibration, with an assumed quantum yield of 0.95 in EtOH<sup>55</sup>. To calculate the quantum yields seen in **Table S5**, we collected the fluorescence and absorbance of both the standard and the donor-only labeled substrate (C3-dT<sub>21</sub>) in the corresponding RecA and DnaA buffers. We then used these data to determine ratios between the integrated fluorescence and absorbance, while correcting for the fractional absorbance at the excitation wavelengths used. Fluorescein in 0.1 M NaOH (known to have a quantum yield of 0.95<sup>56</sup>) was also measured as a control. To ensure reliable readings, all absorbance measurements were conducted with 1  $\mu\text{M}$  dye/substrate, either alone or in the presence of 10  $\mu\text{M}$  of the indicated protein.

All emission measurements were conducted with 25 nM dye/substrate, either alone or in the presence of 10  $\mu$ M of the indicated protein. Since the presence of protein had no influence on dye absorbance (**Figure S8ciii and S8cv**), the quantum yield of the donor in the presence of different proteins was determined simply by using its value in buffer, and multiplying by the observed changes in fluorescence.  $R_0$  values were then calculated for each sample using the corresponding values for quantum yield.

#### *Determination of FRET Efficiencies and DNA Length*

To determine the efficiency of transfer ( $E$ ) from the FRET data collected using the DNA extension assay (**Figure 3, S6, S8 and S9**), the emission of the donor from the donor-only labeled substrate (C3-dT<sub>21</sub>,  $F_D$ ) was compared to the emission of the donor from the doubly-labeled substrate FR-dT<sub>21</sub> ( $F_{DA}$ ) under equivalent experimental conditions as follows:

$$E = 1 - \frac{F_{DA}}{F_D}$$

<sup>57</sup>. The efficiencies for different samples can be found in **Table S5**. Solution distances were subsequently obtained using the relation:

$$R = R_0 \left[ \frac{1 - E}{E} \right]^{1/6}$$

<sup>54</sup>, the values of which also can be found in **Table S5**.

#### *DNA Strand Displacement Assay*

The DnaA-dependent displacement of single strands from duplex-DNA was monitored using a Cy3 label on one of two strands (the “bottom” strand, **Table S3**). All measurements were carried out at 25°C in 80  $\mu$ L of binding buffer containing 50 mM HEPES pH 7.5, 125 mM KCl, 2% (v/v) glycerol, 10 mM MgCl<sub>2</sub>, 0.1 mg/ml bovine serum albumin, 1 mM DTT and 2 mM ADP or ADP•BeF<sub>3</sub> (a non-hydrolyzable ATP analog that mimics the properties of ATP<sup>25, 58</sup>). After a short 2 min incubation of 25 nM duplex-DNA with various DnaA concentrations (**Figure 4**), 50 nM of unlabeled bottom strand was added for an additional 30 min

to capture displaced top strands. Following quenching with 10x stop buffer containing 200 mM EDTA, 10 mg/mL Proteinase K and 4%(v/w) SDS, displaced strands were separated on native polyacrylamide gels in Tris/boric acid/EDTA (TBE) buffer and visualized using a Molecular Dynamics Typhoon. The time dependence of DNA strand displacement by DnaA can be found in [Figure S11](#). Sequences of substrates used can be found in [Table S3](#).

#### *ssDNA Binding Assay*

Binding of 5' fluorescein-labeled dT<sub>25</sub> oligonucleotides (F-dT<sub>25</sub>, [Table S3](#)) to DnaA was monitored by fluorescence polarization using a Victor 3V (Perkin Elmer) multi-label plate reader ([Figure S4](#)). Measurements were carried out at 25°C in 20 µL of binding buffer containing 50 mM HEPES pH 7.5, 125 mM KCl, 2% (v/v) glycerol, 10 mM MgCl<sub>2</sub>, 0.1 mg/ml bovine serum albumin, 1 mM DTT and 2 mM ADP•BeF<sub>3</sub>. The concentration of F-dT<sub>25</sub> was held constant at 10 nM while the concentration of DnaA was varied. All data points represent the average of three independent measurements, with error bars representing the standard deviation between measurements. Binding curves were fit to the Hill equation to obtain  $K_{d,app}$  values ([Table S4](#)) as described previously<sup>25</sup>.

#### *Oligomerization Characteristics of ssDNA-Binding Mutants*

To confirm that ssDNA binding mutations did not affect the ATP-dependent oligomerization properties of DnaA, we employed a previously established glutaraldehyde-crosslinking assay<sup>25</sup>. Crosslinking was performed by incubating 50 µg/ml of various AaDnaA proteins in 80 µL of a reaction buffer (50 mM HEPES pH 7.5, 10% (v/v) glycerol, 125 mM KCl, 5 mM MgCl<sub>2</sub>, 2 mM DTT) containing 2 mM ADP•BeF<sub>3</sub> at 25°C for 5 minutes. Glutaraldehyde (Polysciences Inc.) was then added to 1 mM final concentration using 8.8 µL of a 10 mM stock. Reactions were incubated at 25°C for an additional 1 minute before quenching with 8 µL of 200 mM glycine followed by the addition of 30 µL of gel loading buffer (100 mM Tris pH 6.8, 24% (v/v) glycerol, 8% (w/v) SDS, 200 mM DTT, 0.02% (w/v) bromophenol blue). Crosslinked proteins were loaded in a

volume of 15  $\mu$ L and separated on denaturing 4.5% polyacrylamide gels (80:1 acrylamide:bisacrylamide) in 0.1 M sodium phosphate, 0.1% SDS buffer (pH 7.2)<sup>59, 60</sup>, and visualized by silver staining (**Figure S4b**).

44. MacDowell, A. A. *et al.* Suite of three protein crystallography beamlines with single superconducting bend magnet as the source. *J. Synchrotron Radiat.* **11**, 447-455 (2004).
45. Otwinowski, Z. & Minor, W. in *Methods in Enzymology* 307-326 (Academic Press, New York, 1997).
46. Adams, P. D. *et al.* PHENIX: building new software for automated crystallographic structure determination. *Acta Crystallogr. D Biol. Crystallogr.* **58**, 1948-1954 (2002).
47. Terwilliger, T. C. Maximum-likelihood density modification. *Acta Crystallogr. D Biol. Crystallogr.* **56**, 965-972 (2000).
48. Emsley, P. & Cowtan, K. Coot: model-building tools for molecular graphics. *Acta Crystallogr. D Biol. Crystallogr.* **60**, 2126-2132 (2004).
49. Brunger, A. T. *et al.* Crystallography & NMR system: A new software suite for macromolecular structure determination. *Acta Crystallogr. D Biol. Crystallogr.* **54**, 905-921 (1998).
50. DeLano, W. L. The PyMOL Molecular Graphics System (San Carlos, CA: DeLano Scientific). (2002).
51. Ennifar, E., Carpentier, P., Ferrer, J. L., Walter, P. & Dumas, P. X-ray-induced debromination of nucleic acids at the Br K absorption edge and implications for MAD phasing. *Acta Crystallogr. D Biol. Crystallogr.* **58**, 1262-1268 (2002).
52. Felczak, M. M. & Kaguni, J. M. The box VII motif of Escherichia coli DnaA protein is required for DnaA oligomerization at the E. coli replication origin. *J. Biol. Chem.* **279**, 51156-51162 (2004).
53. Mujumdar, R. B., Ernst, L. A., Mujumdar, S. R., Lewis, C. J. & Waggoner, A. S. Cyanine dye labeling reagents: sulfoindocyanine succinimidyl esters. *Bioconjug. Chem.* **4**, 105-111 (1993).
54. Cantor, C. R. & Schimmel, P. R. in *Biophysical Chemistry: Part II: Techniques for the study of biological structure and function* 846 (W. H. Freeman and Company, 1980).
55. Magde, D., Wong, R. & Seybold, P. G. Fluorescence quantum yields and their relation to lifetimes of rhodamine 6G and fluorescein in nine solvents: improved absolute standards for quantum yields. *Photochem. Photobiol.* **75**, 327-334 (2002).
56. Lakowicz, J. R. in *Principles of Fluorescence Spectroscopy, 2nd Ed.* (Kluwer Academic/Plenum Publishers, 1999).
57. Clegg, R. M. Fluorescence resonance energy transfer and nucleic acids. *Methods Enzymol.* **211**, 353-388 (1992).
58. Petsko, G. A. Chemistry and biology. *Proc. Natl. Acad. Sci. U. S. A.* **97**, 538-540 (2000).

59. Crisona, N. J. & Cozzarelli, N. R. Alteration of Escherichia coli topoisomerase IV conformation upon enzyme binding to positively supercoiled DNA. *J. Biol. Chem.* **281**, 18927-18932 (2006).
60. Weber, K. & Osborn, M. The reliability of molecular weight determinations by dodecyl sulfate-polyacrylamide gel electrophoresis. *J. Biol. Chem.* **244**, 4406-4412 (1969).
